# Supplementary material
Source: PubMed Central journal article supplement (PMC1679786)
Supplement: 7400820-s1.pdf [file 7400820-s1.pdf]

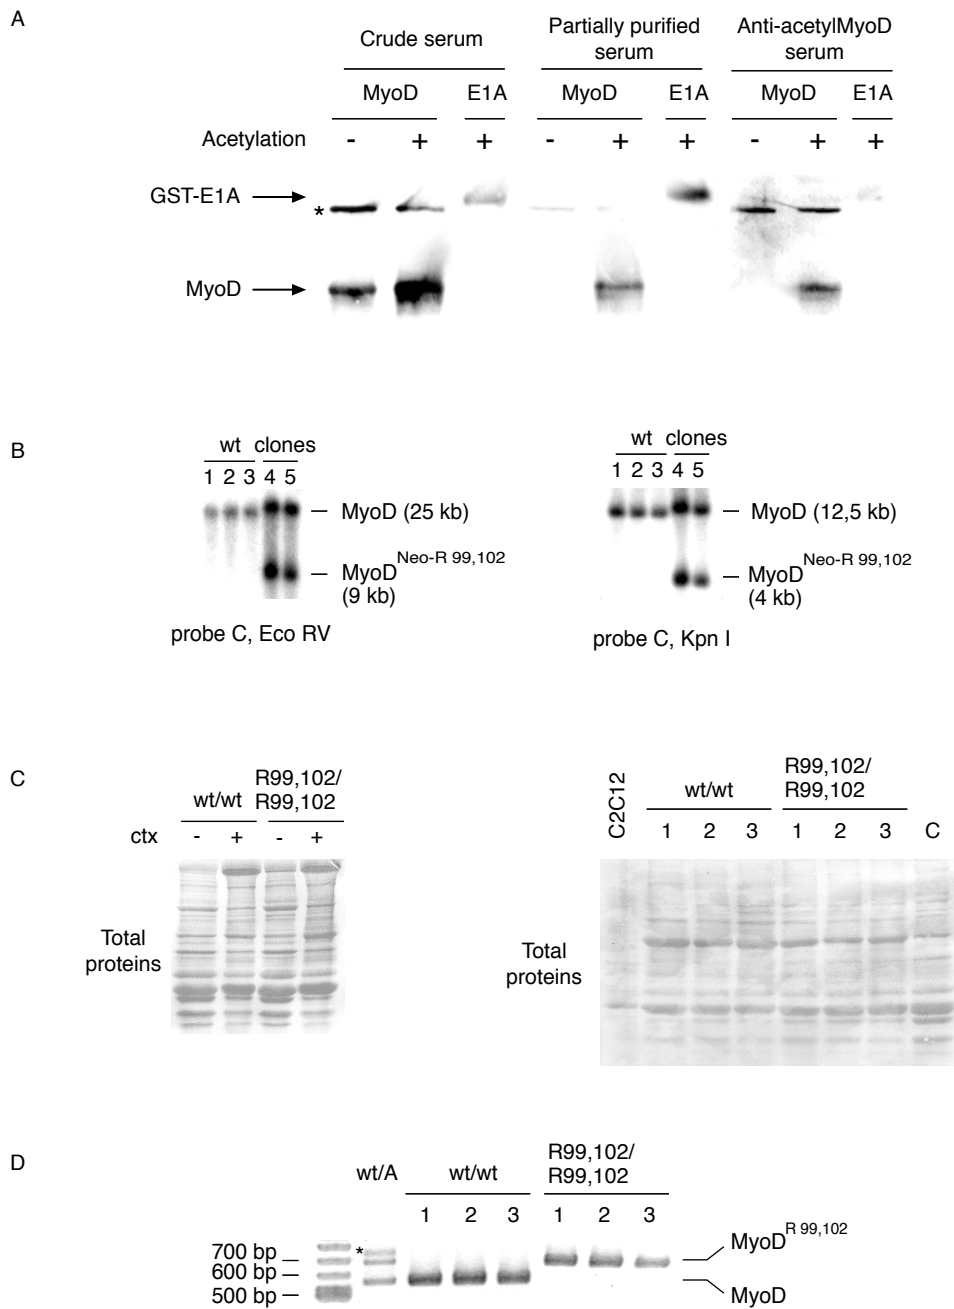

**A.** Anti-acetylMyoD serum recognizes specifically the acetylated form of MyoD.

Recombinant MyoD or GST-E1A were either mock-acetylated, or acetylated in vitro, and analysed by Western Blot using non-purified serum, partially purified serum by absorption on a non-acetylated MyoD peptide, or fully purified as described in the Materials and Methods. Asterisk indicates a non-specific band.

**B.** Genotyping of ES cells. DNA was isolated from neomycin-resistant ES cell colonies, and analysed by Southern blotting, after digestion by Kpn I or EcoRV as indicated, and using indicated probes. Wt : position of the wild-type allele; MyoD Neo R99,102 : position of the mutated allele.

**C.** Example of normalization of total protein in tissue lysates from regenerating TA muscles by Ponceau staining. Ctx : cardiotoxin. C : non-injured control.

**D.** Genotype of mice used for regeneration experiments.

Genotype of mice was determined by PCR as described in materials and methods. Wt/A : heterozygous wt/R99,102 mice. Asterisk indicates an artefactual PCR band.
