# Supplementary material
Source: PubMed Central journal article supplement (PMC1679786)
Supplement: 7400820-s2.pdf [file 7400820-s2.pdf]

A

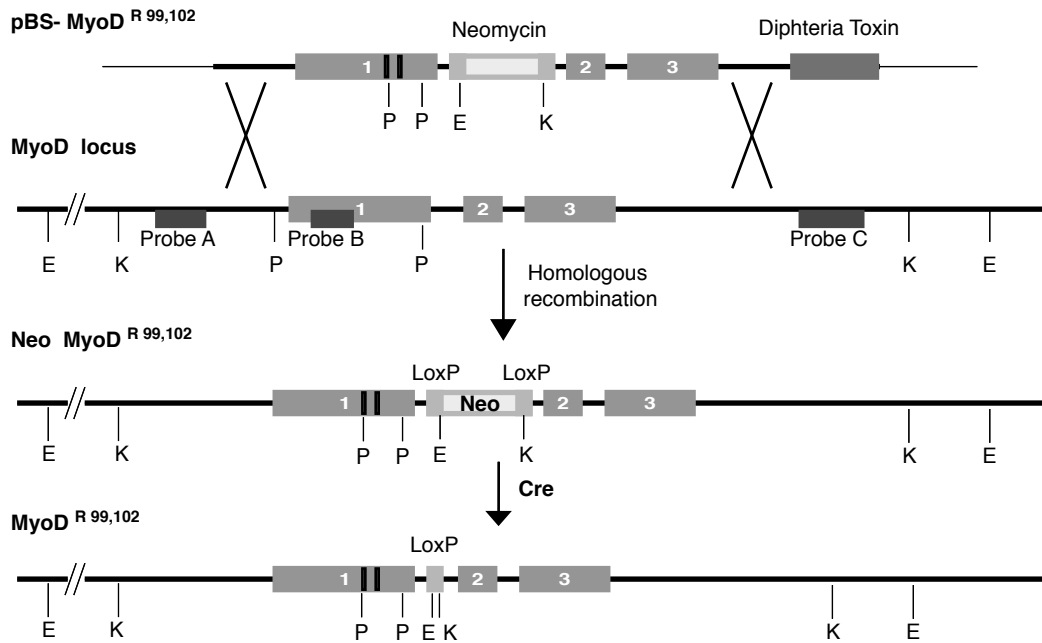

B

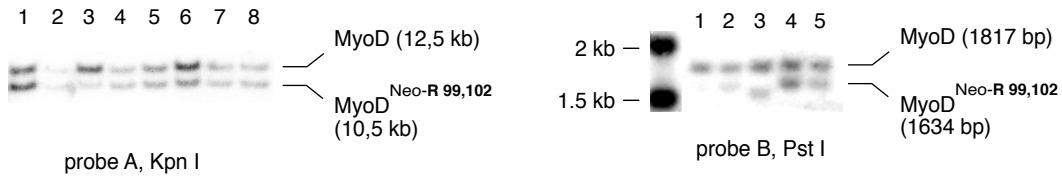

C

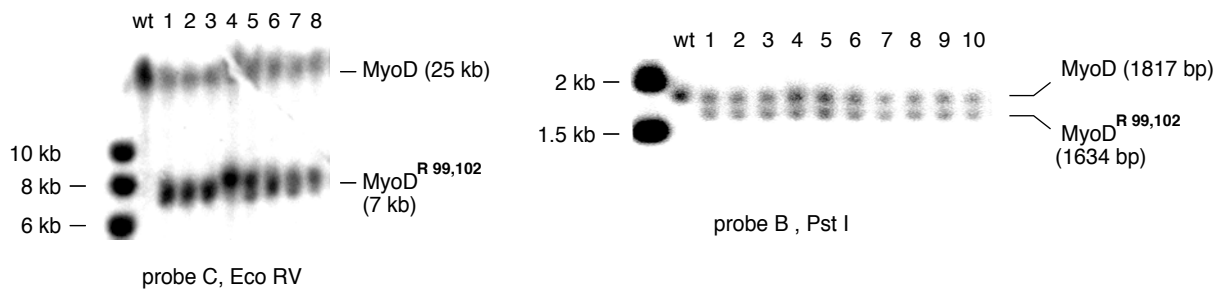

D

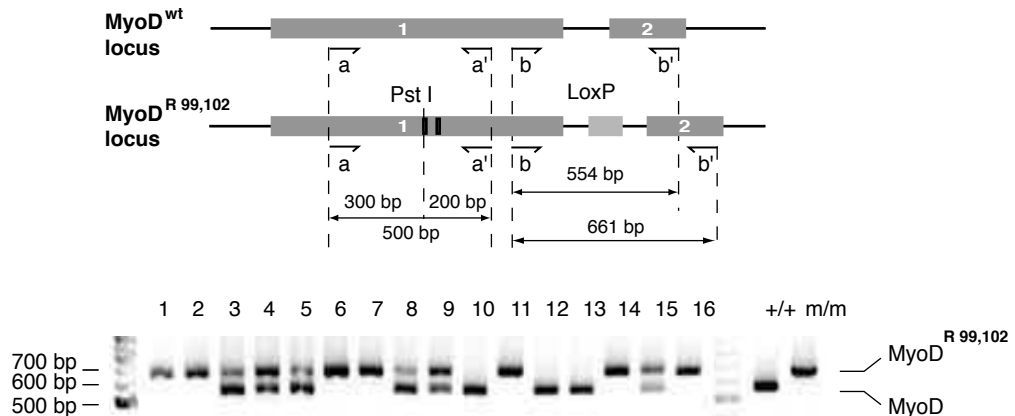

Duquet et al., supplementary data S2:

Targeted replacement of the *myoD* gene in ES cells and mice. A. Schema of the plasmid construction strategy; MyoD exons are represented by grey boxes and mutations in MyoD exon I by black bars; the position of probes A, B and C used for Southern blots is shown with black boxes; P: PstI, E: EcoRV, K: KpnI. B. Genotyping of ES cells. DNA was isolated from neomycin-resistant ES cell colonies, and analyzed by Southern blotting, after digestion by KpnI or PstI as indicated, using indicated probes. C. Elimination of neomycin. Littermates from MyoD wt/Neo-MyoDR 99,102 x Cre<sup>+/-</sup> interbreeding were analyzed by Southern blotting, using the indicated restriction enzymes and probes. D. Genotyping of littermates from interbreeding mice heterozygous for the MyoDR 99,102 allele; DNA from newborn mice was analyzed by PCR, using the primers b and b' shown in the upper panel. Also shown in the upper panel are the positions of primers a and a' used for RTPCR-RFLP in Figure 3.
