# Supplementary material
Source: PubMed Central journal article supplement (PMC1679786)
Supplement: 7400820-s3.pdf [file 7400820-s3.pdf]

## Control (resting) TA muscle

Wild-type

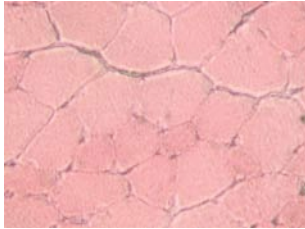

MyoD R99,102

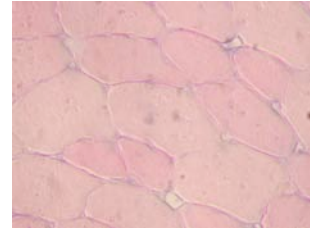

## Regeneration, 15 days

Wild-type

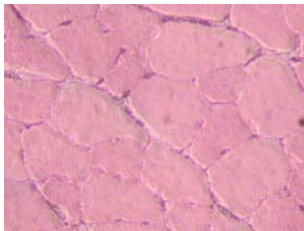

MyoD R99,102

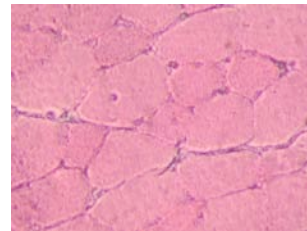

### Duquet et al. Supplemental data S3.

Cardiotoxin-induced regeneration of TA muscle from wild-type and MyoD<sup>R99,102</sup> mice, 15 days timepoint (hematoxylin/eosin staining): there is no fibrosis or fat infiltration after complete regeneration.
