# Supplementary material
Source: PubMed Central journal article supplement (PMC1679786)
Supplement: 7400820-s4.pdf [file 7400820-s4.pdf]

**siRNA, 10nM:**

**control**

**Myf5 -1**

**Myf5 - 2**

Wild type

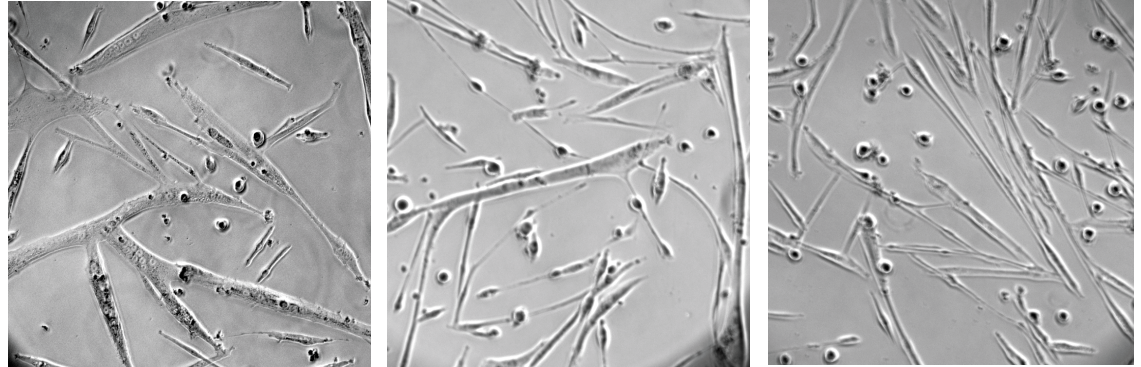

MyoD R99,102

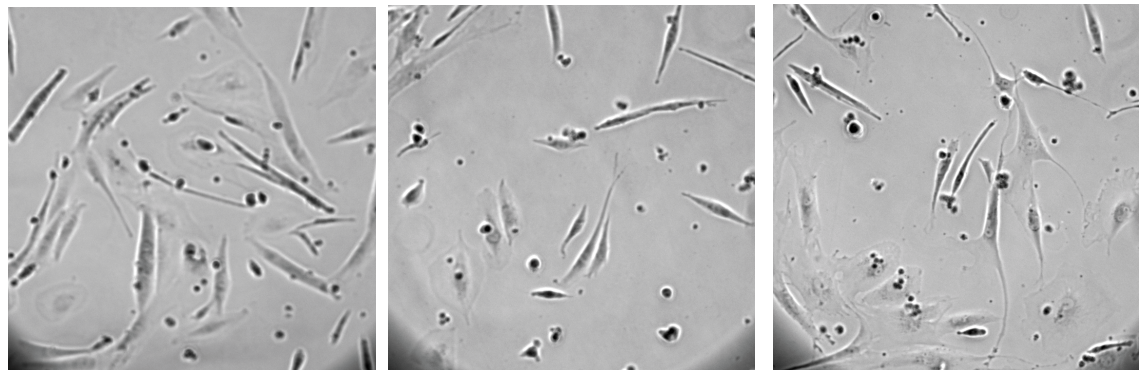

Duquet et al., Supplemental data S4

Phase-contrast photos of hindleg primary myoblasts from wild-type and MyoD<sup>R99,102</sup> mice transfected with indicated siRNAs as described in Materials and Methods, and differentiated for 72 hours.

|                | Myotubes | SD  |
|----------------|----------|-----|
| wt             | 22       | 3.6 |
| wt+ SiRNA1     | 16       | 1.4 |
| wt+ SiRNA2     | 21.3     | 2.5 |
| mutant         | 17       | 2.1 |
| mutant+ SiRNA1 | 10.3     | 2.1 |
| mutant+ SiRNA2 | 8.3      | 1.2 |

Quantitative analysis of the results: (mean of 3 different fields and standard deviation).
