# Supplementary material
Source: PubMed Central journal article supplement (PMC1679786)
Supplement: 7400820-s5.pdf [file 7400820-s5.pdf]

A

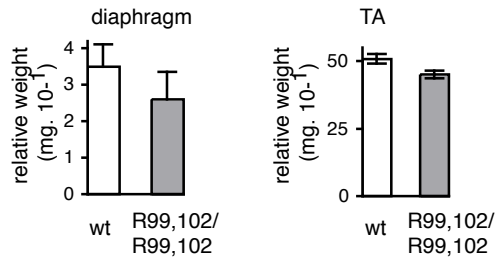

B

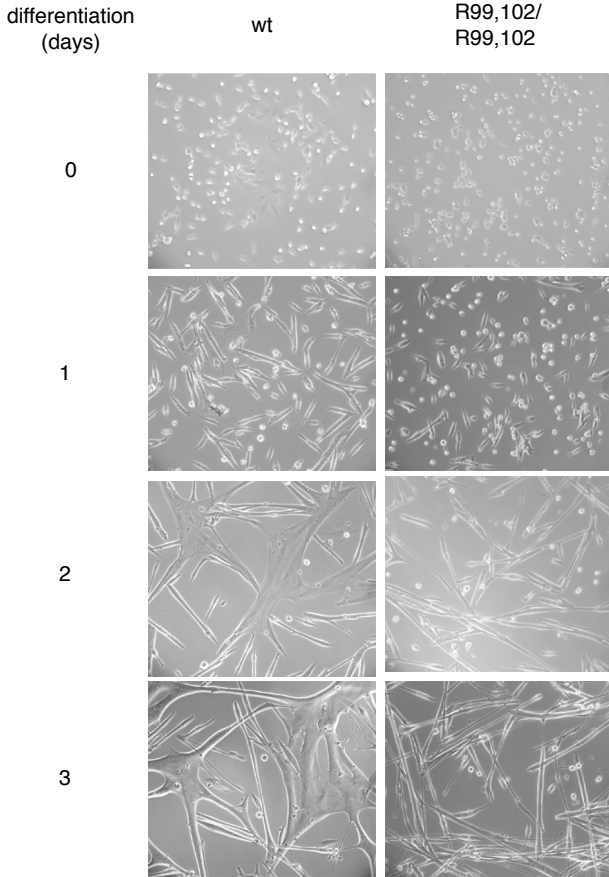

C

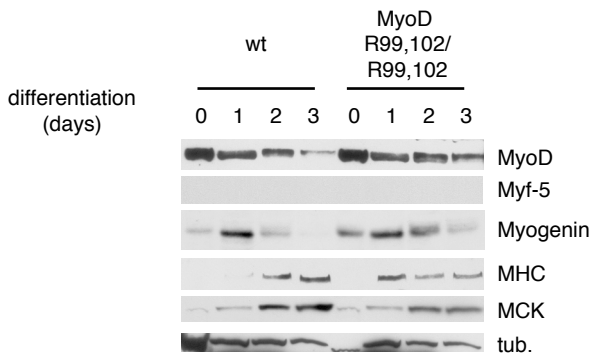

Duquet et al. Supplemental data S5

A. Average weight of the diaphragm and TA muscles from 30 wild-type and MyoD<sup>R99,102</sup> mice, normalized body weight of the animals. B. Phase-contrast photos of differentiating myoblasts from the diaphragm of wild-type and MyoD<sup>R99,102</sup> mice. C. Western Blot analysis of expression of markers of myogenic differentiation in differentiating cells shown in B.
